# Supplementary material for: Essential Role of COP9 Signalosome Subunit 5 (Csn5) in Insect Pathogenicity and Asexual Development of Beauveria bassiana
Source: MDPI journal article supplement (doi:10.3390/jof7080642), 2021-08-07
Supplement: s1 [file jof-1307227-supplementary.pdf › jof-1307227-supplementary.pdf]

## Supplementary Material

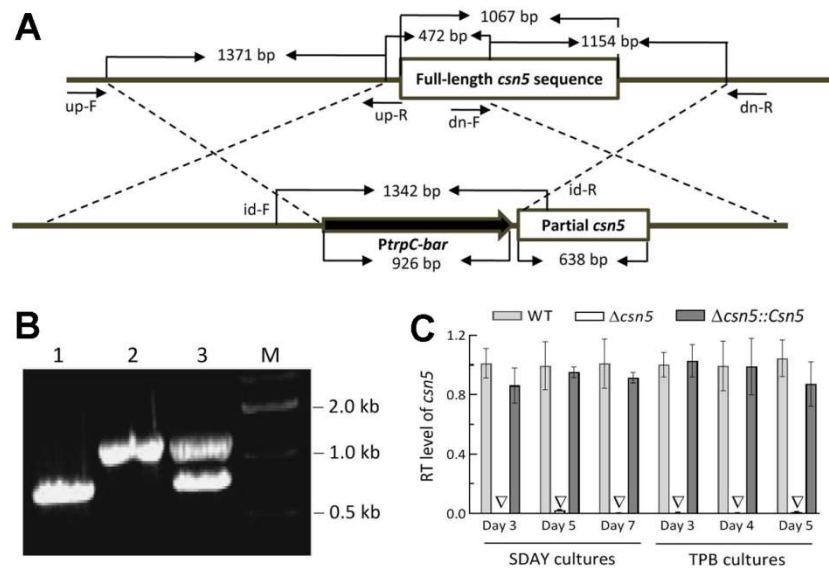

**Figure S1.** Generation and identification of *csn5* mutants in *B. bassiana*. **(A)** Schematic diagram for the disruption strategy of *csn5*. **(B)** The *csn5* mutants identified through PCR analysis (lanes 1–3: WT,  $\Delta csn5$  and  $\Delta csn5::Csn5$  respectively; M, DNA ladder) with paired primers in Table S1. The detected PCR bands denote the fragments of 888 bp in  $\Delta csn5$ , 1,342 bp in WT and both of them in  $\Delta csn5::Csn5$  (888 + 926 – 1342 = 472 bp), indicating that *Csn5* was disrupted by the deletion of its promoter/coding fragment (43 + 429 = 472 bp) as expected. **(C)** Relative transcript (RT) levels of *Csn5* in the SDAY and insect hemolymph-mimicking TPB cultures of *csn5* mutants with respect to the WT standard during 7- and 5-day incubation at optimal 25°C respectively. Note that expression of *Csn5* was abolished in the  $\Delta csn5$  cultures and restored in the  $\Delta csn5::Csn5$  cultures. Error bars: standard deviations of the means from three cDNA samples derived from independent cultures of each strain.

**Table S1.** Paired primers designed for manipulation of *csn5* in *B. bassiana*.

| Primers    | Paired sequences (5'–3')*                                                                    | Purpose                                                       |
|------------|----------------------------------------------------------------------------------------------|---------------------------------------------------------------|
| Csn5-F/R   | CAATCACAACACCTTCAAAATGGAAACGGCTCTCAGGTCATG / CTCGCCCTTGCTC<br>ACCATTGTACTGTTTTGATCCCCCAAGTCG | Cloning <i>csn5</i> cDNA (1014 bp) for fusion to <i>gfp</i>   |
| upCsn5-F/R | ACGAGCTGTACAAGTAACCCGGGGAGCCTATGCGGTATCTATG / TGGCTGCAGGTC<br>GACGGATCCGAGTTGGGAGTTAGTGTTC   | Cloning <i>csn5</i> 5' fragment (1371 bp)                     |
| dnCsn5-F/R | GACCCATGGCTCGAGTCTAGAAAAATGTTGTCGGATGGTA / GGTGGTGGTGGCTAG<br>CGTTAACTTCTGTCACTGGAGGATTG     | Cloning <i>csn5</i> 3' fragment (1154 bp)                     |
| flCsn5-F/R | ATCCGTCGACCTGCAGCCAAGCTTAACCAAGCAGGTAAGGC / AACTAGTCAGAT<br>CTTCTAGTGTACACCCACGACATTGAGG     | Cloning full-length <i>csn5</i> for complementation (3991 bp) |
| pCsn5-F/R  | CTCCAGCATTGCGCAACA / CTGAAACCCATCCGACCC                                                      | PCR detecting <i>csn5</i> (888 bp)                            |
| qCsn5-F/R  | TCGTGACTTTGCAAAACAAGC / GACGCCAGTAGCCAGAAATC                                                 | qPCR detecting <i>csn5</i>                                    |

\* Underlined regions denote introduced cleavage sites of two pairs of restriction enzymes (*Xma*I/*Bam*HI and *Xba*I/*Hpa*I) for homogeneous recombination of the *bar*-separated 5' and 3' fragments for the disruption of *csn5* or the fragments for gateway exchange.

**Table S2.** Paired primers used for transcriptional profiling of *csn5*-related genes in *B. bassiana*.

| Gene                                                      | Tag locus <sup>a</sup> | Annotation <sup>b</sup>                | Sequences (5'–3') of paired primers          |
|-----------------------------------------------------------|------------------------|----------------------------------------|----------------------------------------------|
| <b>Used as internal standard</b>                          |                        |                                        |                                              |
| <i>act</i>                                                | BBA_04860              | β-actin                                | GGCAACATTGTCATGTCTGG / TTTGCTGGAAGGTGGATAGG  |
| <b>Involved in asexual development and hydrophobicity</b> |                        |                                        |                                              |
| <i>brlA</i>                                               | BBA_07544              | Developmental activator BrlA           | GATGGATGACAAGTGCGATG / AAACCTGCACGAGAAACGAT  |
| <i>abaA</i>                                               | BBA_00300              | Developmental activator AbaA           | GCAAGTCTCCAGCCATAT / CTCCTCTTCGTCATAGTAGTC   |
| <i>wetA</i>                                               | BBA_06126              | Developmental activator WetA           | ATGCGGTACTACAGCCAAGG / GAGTTCCTGCTGGCTACTGG  |
| <i>vosA</i>                                               | BBA_01023              | The velvet protein VosA                | ACTCATGGGCTCATTGGTGG / CCGGCAAGAGAGATCCGAAA  |
| <i>hyd1</i>                                               | BBA_03015              | Class I hydrophobin Hyd1               | ATGGTGGAAAGGATCTGCAC / TGGGAAAAGAACCATCAGC   |
| <i>hyd2</i>                                               | BBA_06599              | Class II hydrophobin Hyd2              | TGTCAAGACTGGCGACATTT / ATTGGGACAAGCTGGTTGAG  |
| <b>Involved in response to heat shock</b>                 |                        |                                        |                                              |
| <i>hsp30a</i>                                             | BBA_08688              | Heat shock protein 30                  | AGGCGTGAAAAAGGAAGACA / GGTTGACGCCTCTGTCGTAT  |
| <i>hsp30b</i>                                             | BBA_02057              | Heat shock protein 30                  | ATTGCTCGCAACAACAACAA / CAAGATACCGTCTGGAAGC   |
| <i>hsp40a</i>                                             | BBA_06930              | Chaperone DnaJ, Mdj1                   | AAACCCTGGCGATGATACTG / AGAAACGGCTGAAAAGGTCA  |
| <i>hsp40b</i>                                             | BBA_08440              | Heat shock protein, Hsp40, DnaJ        | CAAGAAGTGCAAGGGAAAGC / TACCGAGACGCGAAAAGACT  |
| <i>hsp40c</i>                                             | BBA_03736              | Chaperone protein dnaJ 2, Mas5         | CAAGAAGTGCAAGGGAAAGC / TACCGAGACGCGAAAAGACT  |
| <i>hsp60</i>                                              | BBA_05467              | Chaperonin GroL                        | AGAAGAACAAGCGCGACATT / GGTGATGAAGTAGGGCGAAA  |
| <i>hsp70a</i>                                             | BBA_00941              | Hsp70 protein                          | ACGCTTGAAAGTCTGCCCTA / GGATTTACACGAGCCTGGA   |
| <i>hsp70b</i>                                             | BBA_05586              | Heat shock protein 70-2                | CACGTAATCTTGGCTCGGTA / ACCTCGGGGTCTGAGAATT   |
| <i>hsp90</i>                                              | BBA_06516              | Heat shock protein 90                  | GGTCAGTTCGGTGTGGTTT / CGTCCTTGAGGTGGAGGATA   |
| <i>hsp104</i>                                             | BBA_02283              | Heat shock protein HSP98               | ATGTTCCCGACAACCTGAAG / GCACCATGAGAAGGTGAAT   |
| <b>Involved in ubiquitin activation (E1 family)</b>       |                        |                                        |                                              |
| <i>ubi1/2</i>                                             | BBA_06852              | Ubiquitin family protein               | GCCAAGCTGCTAGCATTACC / CGCCATGAAAAGGAAAACAT  |
| <i>ubi3</i>                                               | BBA_09309              | Ubiquitin family protein               | ATCCTCCCCACCATTACCTC / CTGGGTCTGCTCTGTCTAGC  |
| <i>ubi4</i>                                               | BBA_03881              | Polyubiquitin precursor Ubi4           | GCTCCTCTTTAGCAGCATGG / GCAAACTGCACGTAATCCA   |
| <b>Involved in ubiquitin conjugation (E2 family)</b>      |                        |                                        |                                              |
| <i>ubc1</i>                                               | BBA_07096              | E2 ubiquitin-conjugating protein UBC1  | CGATAGCTACCCGTTCAAGC / GGGTTGCTCGTTCATCATCT  |
| <i>ubc2</i>                                               | BBA_01469              | E2 ubiquitin-conjugating protein RAD6  | GTGACTTCAAGCGAATGCAA / GCTCCTCAAAGTCATCACA   |
| <i>ubc3</i>                                               | BBA_06665              | E2 ubiquitin-conjugating enzyme        | GGACGAGCGAGAAAAGTACG / TCCATGTCACTGTCTGCTACC |
| <i>ubc4</i>                                               | BBA_01937              | E2 ubiquitin-conjugating protein UBC4  | ATTGTGGGACCTCACGAGAC / ACCTCTCCAGTGCCTAGAA   |
| <i>ubc5</i>                                               | BBA_09007              | E2 ubiquitin-conjugating protein UBC5  | TCTACCACCAAAACGTCACA / TCTCCATGGCGTACTTTTC   |
| <i>ubc6</i>                                               | BBA_03114              | E2 ubiquitin-conjugating protein UBC6  | AATATTCCCGCCCACTACC / ACATTCTGTGAGACGGAACC   |
| <i>ubc7</i>                                               | BBA_02005              | E2 ubiquitin-conjugating protein UBC7  | GAGCTCAAGTTTCCCAAGGA / GAATCTTTTGACCGACTGG   |
| <i>ubc8</i>                                               | BBA_06237              | E2 ubiquitin-conjugating protein UBC8  | TCGCCAATGTTTGACATGAT / ATCGTCGTATCTTCGCTCT   |
| <i>ubc9</i>                                               | BBA_06098              | E2 SUMO-conjugating protein UBC9       | TACAGCAAGAGCGCAAGCTA / GGGTATTTCATCGGGGAAAGT |
| <i>ubc10</i>                                              | BBA_00143              | E2 ubiquitin-protein ligase peroxin 4  | GTCGTCCAACGTCTCCAAAT / CACTGCATCAAGCTCTCGTC  |
| <i>ubc11</i>                                              | BBA_00216              | E2 ubiquitin-protein ligase UBC11      | AGCTTGCAGACGGAAGTAT / GGGTAGTTGGAGGGGAAGTC   |
| <i>ubc12</i>                                              | BBA_04666              | NEDD8-conjugating protein UBC12        | ACCTTTGCCATCAACCAGAG / GGCTCGAGGAACAAAAGT    |
| <i>ubc13</i>                                              | BBA_09651              | E2 ubiquitin-conjugating protein UBC13 | ACGAAGGTGGCATTTCCTAAG / GGGGACCAAGTTTCTTCA   |
| <i>ubc14</i>                                              | BBA_07061              | Ubiquitin-conjugating protein DMA2     | GCTGGGAGGAGTTGTGTCAT / TTGGGTTCTTGCCAGTTAC   |

Table S2 (continued)

| Gene                                                      | Tag locus <sup>a</sup> | Annotation <sup>b</sup>                    | Sequences (5'–3') of paired primers          |
|-----------------------------------------------------------|------------------------|--------------------------------------------|----------------------------------------------|
| <b>Involved in ubiquitin-protein ligation (E3 family)</b> |                        |                                            |                                              |
| <i>upl1</i>                                               | BBA_00743              | Ubiquitin-protein ligase TUL1              | GTTTCGCCTTTGTCATCCTC / GCAAAGTCTCCCCATTGTGT  |
| <i>upl2</i>                                               | BBA_00804              | RBR-type E3 ubiquitin transferase          | ACGTCTTTGGCACCATTAGG / GTCCCCGTAAAAGTCGCATA  |
| <i>upl3</i>                                               | BBA_01028              | E3 ubiquitin-protein ligase BRE1           | AGGGGAAGTTAAACCCGAGA / TGCTGTTCCAACCTCTGCAC  |
| <i>upl4</i>                                               | BBA_01431              | E3 ubiquitin-protein ligase HEL1           | GCCTGCTTTGCTGATAGTCC / GTTCGCAACCAAGAGAAAGC  |
| <i>upl5</i>                                               | BBA_02443              | E3 ubiquitin-protein ligase PRP19          | TTGATGCCTCACTCACAACC / CTGCTAGCCAGAAACCGTTC  |
| <i>upl6</i>                                               | BBA_03508              | E3 ubiquitin-protein ligase RAD18          | CTGCGGAGTAATTGGTCCAT / CTACACTCGGCGTAGGTGGT  |
| <i>upl7</i>                                               | BBA_04432              | E3 ubiquitin-protein ligase UBR1           | GCGCTAAGTGGCATCAAG / ACCAAGGTGGATAAGCGATG    |
| <i>upl8</i>                                               | BBA_05204              | E3 ubiquitin-protein ligase HEL1           | CTCGCCGAGTCCAACACTC / CCAGCGTTTCGTAGAGTTCC   |
| <i>upl9</i>                                               | BBA_05776              | E3 ubiquitin-protein ligase HEL2           | GGAGCAGCATTTCAAAAAGG / GAGGTCAAAACAGCCATGT   |
| <i>upl10</i>                                              | BBA_06925              | Ubiquitin-protein ligase peroxin 12        | TTTCGAGTCTGTCGGTAGCC / TAAATGCTTGGCCAAAGAC   |
| <i>upl11</i>                                              | BBA_07173              | E3 ubiquitin-protein ligase IRC20          | CTTTTAGTGCGGTCGAGGAG / ATCGGCCGTTCTTTATTGTG  |
| <i>upl12</i>                                              | BBA_07231              | E3 ubiquitin-protein ligase HRD1           | GCAAGAAGTCAGGGAACAGC / TCCAGCCAAAGTACCCATTTC |
| <i>upl13</i>                                              | BBA_07605              | E3 ubiquitin-protein ligase RKR1           | CGAGGCCAAGTACTTTCGAG / CATGGCCTGTCTGCACTCTA  |
| <i>upl14</i>                                              | BBA_09149              | E3 ubiquitin-protein ligase SSM4           | GCGCGAAGAATTTGAGGTAG / GCGCAATTCATGTACGTGTG  |
| <i>upl15</i>                                              | BBA_09504              | Ubiquitin-protein ligase PSH1              | ATTGCGGAACAACATCAACA / TGACGATCGCCTTCTCTCTT  |
| <i>upl16</i>                                              | BBA_01822              | NEDD4 family E3 ubiquitin-protein ligase   | TGGTGAGCAAAAGTCACGTC / GTATGTGCCTTGGGCAAGTT  |
| <i>upl17</i>                                              | BBA_03558              | Putative ubiquitin-protein ligase UFD4     | ATCAGCTCATAAGCCGAGT / AGACGCAAGATGGAAGCTGT   |
| <i>upl18</i>                                              | BBA_05494              | Putative E3 ubiquitin-protein ligase HUL4  | GTCCGGAAGAGATTGAGCTG / TCACTGCCGGTGATAAATGA  |
| <i>upl19</i>                                              | BBA_05518              | E3 ubiquitin-protein ligase TOM1           | GCGAACTATTACCGAGAGC / CCACTGTGTTGTCCCTCGTT   |
| <i>upl20</i>                                              | BBA_05644              | Ubiquitin-ubiquitin ligase HUL5            | CTCTGGCCTCAGAACACACA / CTCCAGGCACGGTTTGTAAAT |
| <i>upl21</i>                                              | BBA_00267              | Ubiquitin ligase complex subunit HRD3      | AGCTTGTCGATTTGGCCTTG / CAGGTATAGTGCCTCCGAGT  |
| <i>upl22</i>                                              | BBA_03528              | Putative ubiquitin-protein ligase ASI3     | TTGCATGCACATCCGAACAA / AGAGCGGCCACATAGTAGAC  |
| <i>upl23</i>                                              | BBA_05538              | Ub ligase molybdopterin-converting factor  | GACGCCATTGACAACATCGA / CAGCCCATCGTCGGTACTAT  |
| <b>Involved in deubiquitination</b>                       |                        |                                            |                                              |
| <i>usp1</i>                                               | BBA_02705              | Ubiquitin-specific protease UBP1           | GAGCGTGCACTACGAGATGA / ACAGATCGCTGTCCGAGAGT  |
| <i>usp2</i>                                               | BBA_07124              | Ubiquitin-specific protease UBP2           | AGCGATCTTCAGGCACAGAT / ATCAAAGCTGACCTCGTGCT  |
| <i>usp3</i>                                               | BBA_08453              | Ubiquitin-specific protease UBP3           | ACTCTTTGCCAAGACGCCTA / GCCAACCTTGAGGATCGAA   |
| <i>usp4</i>                                               | BBA_04102              | Putative ubiquitin-specific protease UBP12 | CTCTTGACCGCAAGGTTCTC / GGGCAAGTCAATCAGCAAAT  |
| <i>usp5</i>                                               | BBA_00871              | Ubiquitin-specific protease YUH1           | CGGAGATTGCTTCAACCTG / TTCTCCTCTCCAGACTCCCA   |
| <i>usp6</i>                                               | BBA_01234              | Ubiquitin-specific protease YUH1           | CTTCACATCGCTTCTCCAGC / CGGCGGTCTGTGTGAAGTC   |
| <i>usp7</i>                                               | BBA_01266              | Ubiquitin-specific protease YUH1           | GCAATAAGAGGCGCAATCCA / GCACCTTGACGTCCTTGATC  |
| <i>usp8</i>                                               | BBA_01860              | Ubiquitin-specific protease UBP15          | GCGACAACTACGGCTACTG / GTAATCAGCCGCGACACAAT   |
| <i>usp9</i>                                               | BBA_02115              | Ubiquitin-specific protease UBP13          | CAACGCCAGGCTATCAACTC / TCCTTGAGCCCGGTAAATGT  |
| <i>usp10</i>                                              | BBA_02323              | Ubiquitin-specific protease YUH1           | GTCCAACGTGAATCCTGACC / GGGATAAAGCGAGCAGGTC   |
| <i>usp11</i>                                              | BBA_03889              | Ubiquitin-specific protease UBP13          | CCAAGCTCAACAAGGCCATT / CGTAAATGGAGCGCGATAGG  |
| <i>usp12</i>                                              | BBA_04237              | Ubiquitin-specific protease UBP11          | CCAAGCTCAACAAGGCCATT / CGTAAATGGAGCGCGATAGG  |
| <i>usp13</i>                                              | BBA_04750              | Ubiquitin-specific protease UBP15          | CTCGCAAGAAGGAACATGG / AACGAGGGCAAACTGAACAC   |
| <i>usp14</i>                                              | BBA_04857              | Ubiquitin-specific protease UBP14          | TCCCCAGCCATTCATCAGTT / CCACCATAGAGCCTTTTCGC  |
| <i>usp15</i>                                              | BBA_06326              | Ubiquitin-specific protease UBP14          | TTCTGACGCCAACTCTGCTA / TGAACAACCACTCAACAGCG  |
| <i>usp16</i>                                              | BBA_07695              | Ubiquitin-specific protease UBP6           | CTTTACACGAGGATGAGCGC / CGCCGCTCATGTACTTTTGA  |
| <i>usp17</i>                                              | BBA_10345              | Ubiquitin-specific protease UBP8           | CCAGCGTCACCTATGTTTGG / TTTGCGGCCAGAGAAAGAAC  |

<sup>a</sup> Gene accession codes of *B. bassiana* genome under the NCBI accession NL\_ADAH00000000.

<sup>b</sup> Putative E2, E3 and UBP genes are annotated with respect to their corresponding homologs in budding yeast.

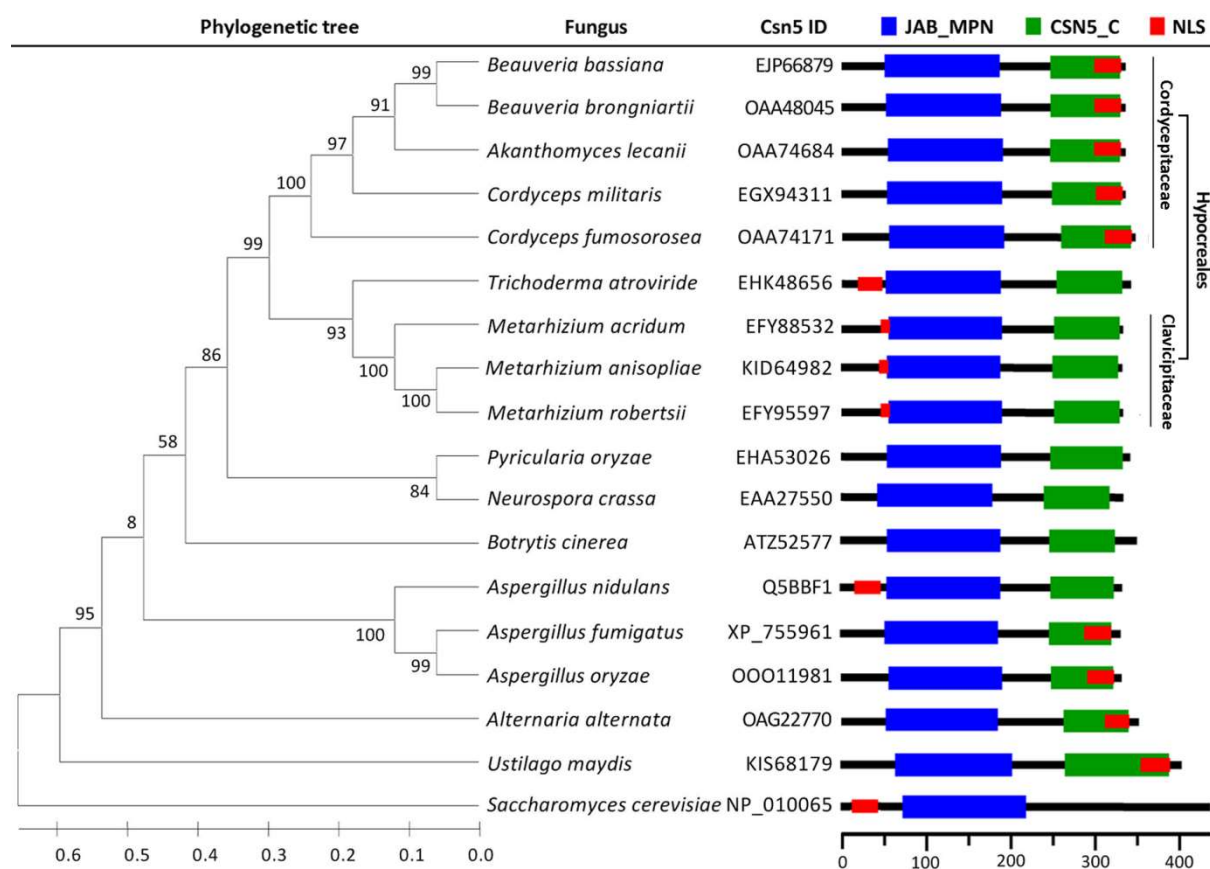

**Figure S2.** Phylogenetic relationships and sequence features of Csn5 orthologues found in entomopathogenic (Hypocreales) and nonentomopathogenic fungi. Scale for phylogenetic tree: branch length proportional to genetic distance assessed with the maximum likelihood method in MEGA7 at <http://www.megasoftware.net/>. Bootstrap values of 1000 replications are shown at nodes. Main domains and NLS motif are predicted at <https://www.ncbi.nlm.nih.gov/Structure/> and <http://nls-mapper.iab.keio.ac.jp/>, respectively.

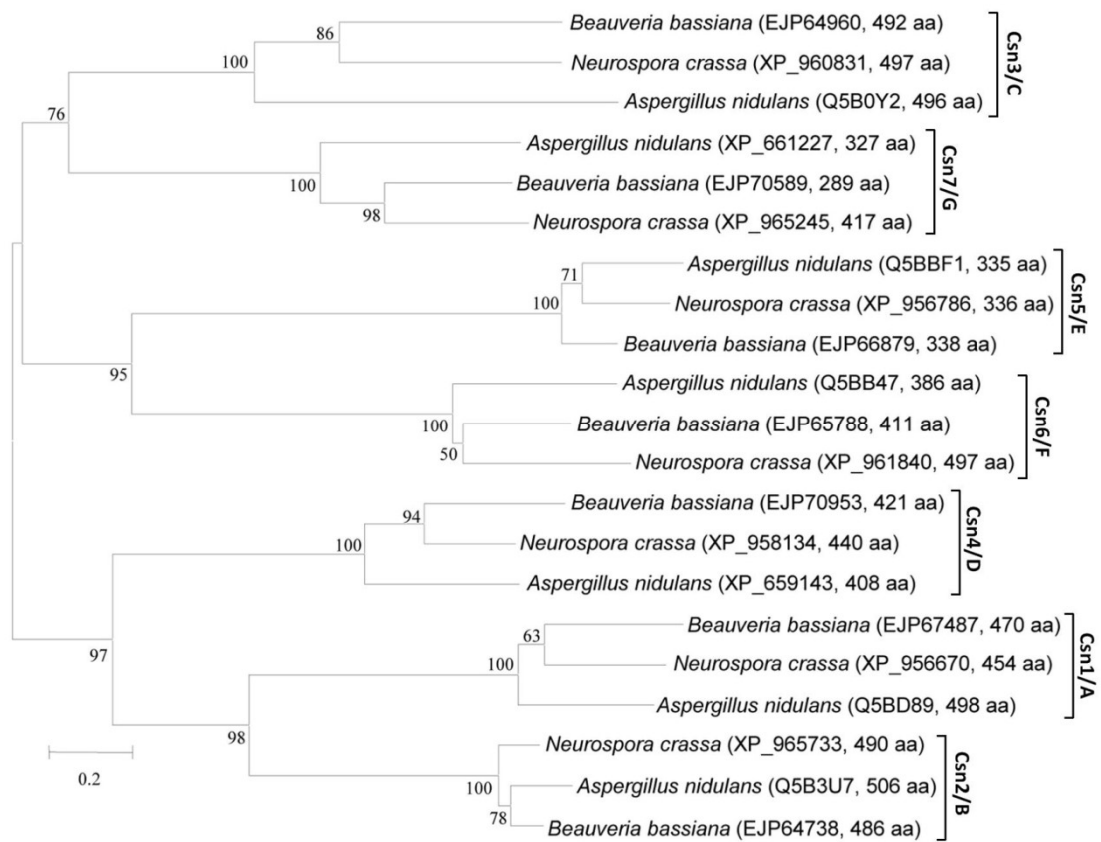

**Figure S3.** Phylogenetic relationships of CSN subunits between *B. bassiana* and two model fungi. Scale: branch length proportional to the genetic distance assessed with the maximum likelihood method in MEGA7 at <http://www.megasoftware.net/>. Bootstrap values of 1000 replications are shown at nodes. The NCBI accession code of each subunit and the length of its amino acid sequence are listed in the parentheses following the fungal name.

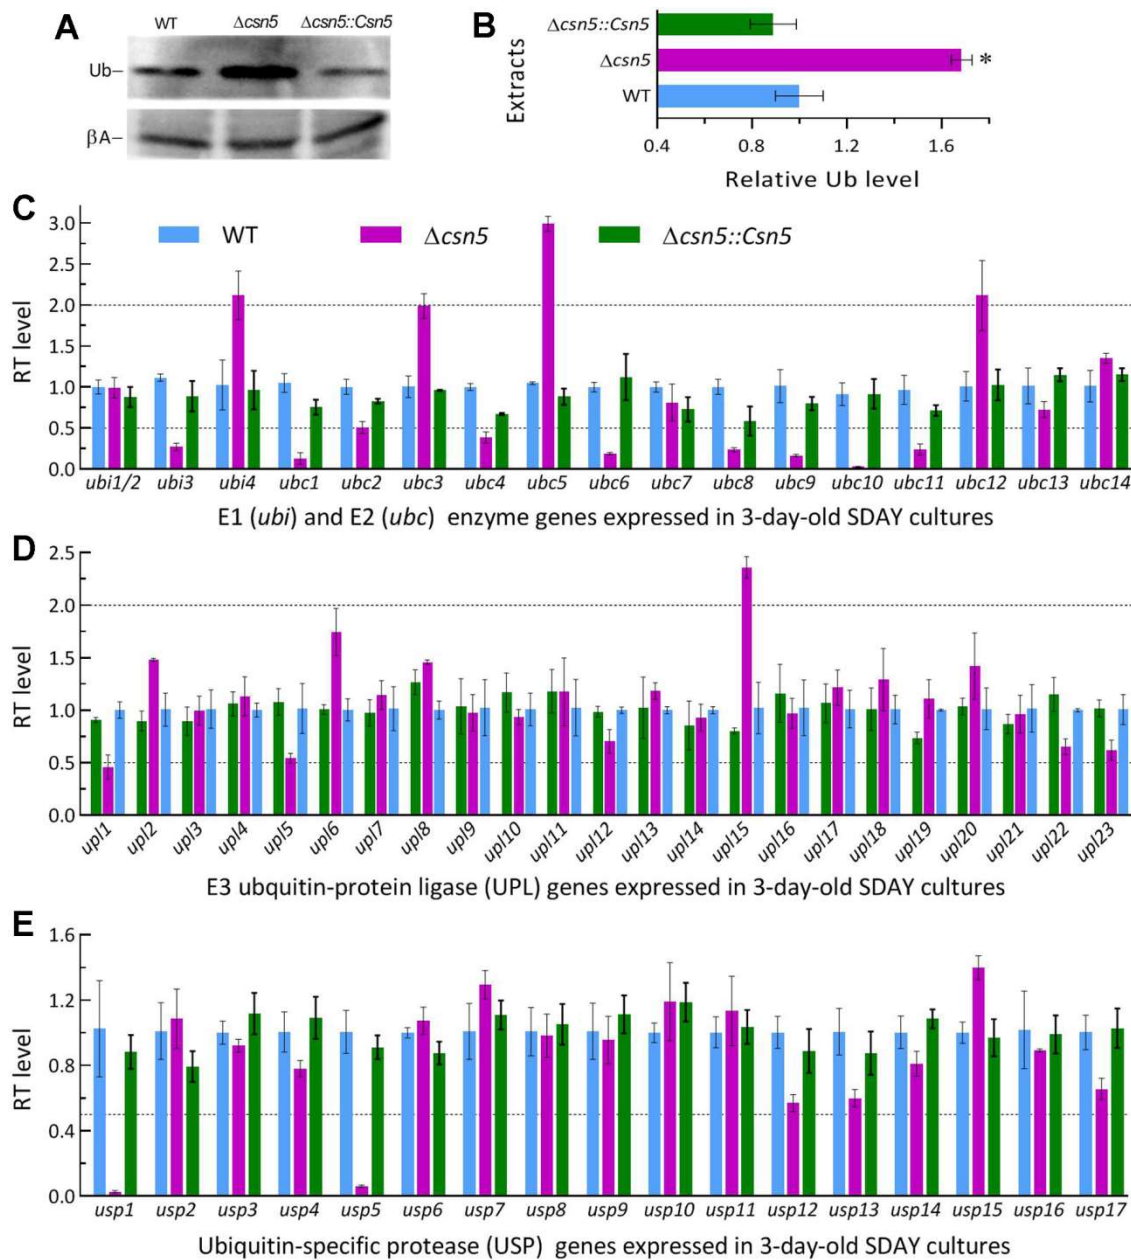

**Figure S4.** Impact of *csn5* deletion on accumulation level of intracellular free ubiquitin and expression levels of putative UPS genes in *B. bassiana*. (**A**, **B**) Western blot for free ubiquitin (Ub) accumulation probed with monoclonal anti-Ub antibody in the protein extracts of 3-day-old SDBY cultures and relative Ub accumulation levels computed as ratios of Ub blot intensities over those of  $\beta$ -actin ( $\beta$ A) as a reference probed with anti- $\beta$ A antibodies, respectively. Each lane was uploaded with 20  $\mu$ g of protein sample. \* $P < 0.001$  in Tukey's HSD test. (**C**–**E**) Relative transcript (RT) levels of E1, E2, E3 and ubiquitin-specific protease (USP) genes in the 3-day-old SDAY cultures of *csn5* mutants with respect to the WT standard. The dashed lines indicate a significant level of one-fold change (50% downregulation or 100% upregulation relative to WT). Error bars: standard deviations of the means from three independent replicates.
